# Supplementary material for: Early Sowing Combined with Adequate Potassium and Sulfur Fertilization: Promoting Beta vulgaris (L.) Yield, Yield Quality, and K- and S-Use Efficiency in a Dry Saline Environment
Source: MDPI journal article supplement (doi:10.3390/agronomy11040806), 2021-04-19
Supplement: s1 [file s1]

**Table S1.** Photosynthetic efficiency (Fv/Fm, PI(%), and SPAD values), and root length (cm) of sugar beet as affected by the interactions of sowing date (D), potassium (K) and sulphur (S), during two growing seasons (Mean  $\pm$  SE) under soil salinity (ECe = 8.96 dS m<sup>-1</sup>) conditions

| Treatments                             | Fv/Fm               | PI (%)              |                     | SPAD values         |                     | Root length (cm) |                 |
|----------------------------------------|---------------------|---------------------|---------------------|---------------------|---------------------|------------------|-----------------|
|                                        | 2018/2019           | 2018/2019           | 2019/2020           | 2018/2019           | 2019/2020           | 2018/2019        | 2019/2020       |
| <b>D <math>\times</math> K</b>         |                     |                     |                     |                     |                     |                  |                 |
| D <sub>1</sub> $\times$ K <sub>1</sub> | 0.82 $\pm$ 0.001c   | 6.05 $\pm$ 0.30d    | 6.08 $\pm$ 0.28d    | 48.2 $\pm$ 1.6c     | 50.4 $\pm$ 1.1d     | 28.8 $\pm$ 1.3cd | 29.8 $\pm$ 0.2c |
| D <sub>1</sub> $\times$ K <sub>2</sub> | 0.84 $\pm$ 0.001b   | 7.88 $\pm$ 0.27b    | 8.33 $\pm$ 0.30b    | 55.8 $\pm$ 1.7b     | 55.8 $\pm$ 0.7b     | 31.6 $\pm$ 0.2b  | 32.0 $\pm$ 0.2b |
| D <sub>1</sub> $\times$ K <sub>3</sub> | 0.86 $\pm$ 0.001a   | 10.19 $\pm$ 0.21a   | 10.34 $\pm$ 0.59a   | 61.5 $\pm$ 1.5a     | 62.9 $\pm$ 1.9a     | 35.5 $\pm$ 0.7a  | 36.3 $\pm$ 1.2a |
| D <sub>2</sub> $\times$ K <sub>1</sub> | 0.81 $\pm$ 0.051c   | 3.98 $\pm$ 0.75f    | 3.78 $\pm$ 0.83f    | 48.4 $\pm$ 5.5c     | 49.5 $\pm$ 2.1d     | 26.5 $\pm$ 3.2e  | 26.9 $\pm$ 4.6e |
| D <sub>2</sub> $\times$ K <sub>2</sub> | 0.82 $\pm$ 0.001c   | 5.30 $\pm$ 0.21e    | 5.27 $\pm$ 0.14e    | 49.3 $\pm$ 0.78c    | 49.7 $\pm$ 0.9d     | 27.9 $\pm$ 0.4d  | 28.4 $\pm$ 0.4d |
| D <sub>2</sub> $\times$ K <sub>3</sub> | 0.84 $\pm$ 0.002b   | 6.69 $\pm$ 0.20c    | 6.67 $\pm$ 0.39c    | 52.0 $\pm$ 0.9c     | 52.5 $\pm$ 0.9c     | 29.7 $\pm$ 0.3c  | 30.3 $\pm$ 0.6c |
| <b>D <math>\times</math> S</b>         |                     |                     |                     |                     |                     |                  |                 |
| D <sub>1</sub> $\times$ S <sub>1</sub> | 0.83 $\pm$ 0.003a   | 7.24 $\pm$ 0.57c    | 7.54 $\pm$ 0.63c    | 51.2 $\pm$ 1.8cd    | 53.1 $\pm$ 1.9c     | 30.2 $\pm$ 0.7c  | 31.3 $\pm$ 0.7c |
| D <sub>1</sub> $\times$ S <sub>2</sub> | 0.84 $\pm$ 0.051a   | 8.04 $\pm$ 1.01b    | 8.15 $\pm$ 1.14b    | 55.8 $\pm$ 6.3b     | 56.6 $\pm$ 2.6b     | 31.6 $\pm$ 3.4b  | 32.0 $\pm$ 4.0b |
| D <sub>1</sub> $\times$ S <sub>3</sub> | 0.85 $\pm$ 0.003a   | 8.84 $\pm$ 0.67a    | 9.06 $\pm$ 0.35a    | 58.5 $\pm$ 2.7a     | 59.4 $\pm$ 1.0a     | 34.1 $\pm$ 1.6a  | 34.8 $\pm$ 0.5a |
| D <sub>2</sub> $\times$ S <sub>1</sub> | 0.82 $\pm$ 0.003a   | 4.92 $\pm$ 0.44f    | 4.87 $\pm$ 0.44f    | 47.8 $\pm$ 0.9e     | 48.5 $\pm$ 0.9e     | 26.7 $\pm$ 0.6f  | 27.7 $\pm$ 0.6f |
| D <sub>2</sub> $\times$ S <sub>2</sub> | 0.82 $\pm$ 0.003a   | 5.31 $\pm$ 0.44e    | 5.22 $\pm$ 0.44e    | 50.1 $\pm$ 0.9d     | 51.0 $\pm$ 0.9d     | 28.1 $\pm$ 0.6e  | 28.3 $\pm$ 0.6e |
| D <sub>2</sub> $\times$ S <sub>3</sub> | 0.83 $\pm$ 0.003a   | 5.75 $\pm$ 0.46d    | 5.63 $\pm$ 0.86d    | 51.9 $\pm$ 0.7c     | 52.2 $\pm$ 1.6c     | 29.3 $\pm$ 0.6d  | 29.6 $\pm$ 1.1d |
| <b>K <math>\times</math> S</b>         |                     |                     |                     |                     |                     |                  |                 |
| K <sub>1</sub> $\times$ S <sub>1</sub> | 0.81 $\pm$ 0.002a   | 4.55 $\pm$ 0.72a    | 4.43 $\pm$ 0.82a    | 46.4 $\pm$ 1.8a     | 47.9 $\pm$ 2.3f     | 26.7 $\pm$ 1.0g  | 27.6 $\pm$ 1.1g |
| K <sub>1</sub> $\times$ S <sub>2</sub> | 0.82 $\pm$ 0.002a   | 5.03 $\pm$ 0.81a    | 4.89 $\pm$ 0.93a    | 48.4 $\pm$ 2.0a     | 50.2 $\pm$ 3.0e     | 27.5 $\pm$ 1.1f  | 28.3 $\pm$ 2.1f |
| K <sub>1</sub> $\times$ S <sub>3</sub> | 0.82 $\pm$ 0.002a   | 5.47 $\pm$ 0.13a    | 5.47 $\pm$ 0.35a    | 50.1 $\pm$ 0.4a     | 51.8 $\pm$ 1.4de    | 28.7 $\pm$ 0.5e  | 29.2 $\pm$ 0.2e |
| K <sub>2</sub> $\times$ S <sub>1</sub> | 0.83 $\pm$ 0.002a   | 5.93 $\pm$ 0.51a    | 6.24 $\pm$ 0.71a    | 49.5 $\pm$ 1.3a     | 50.9 $\pm$ 1.7e     | 28.8 $\pm$ 1.0e  | 29.5 $\pm$ 0.9e |
| K <sub>2</sub> $\times$ S <sub>2</sub> | 0.83 $\pm$ 0.002a   | 6.67 $\pm$ 0.62a    | 6.77 $\pm$ 0.79a    | 53.2 $\pm$ 2.3a     | 53.3 $\pm$ 1.8cd    | 29.8 $\pm$ 0.9d  | 30.1 $\pm$ 0.9d |
| K <sub>2</sub> $\times$ S <sub>3</sub> | 0.84 $\pm$ 0.002a   | 7.18 $\pm$ 0.69a    | 7.40 $\pm$ 0.46a    | 55.0 $\pm$ 2.1a     | 54.2 $\pm$ 0.5c     | 30.7 $\pm$ 0.8c  | 30.9 $\pm$ 0.9c |
| K <sub>3</sub> $\times$ S <sub>1</sub> | 0.84 $\pm$ 0.002a   | 7.75 $\pm$ 0.42a    | 7.95 $\pm$ 0.51a    | 52.6 $\pm$ 1.3a     | 53.6 $\pm$ 0.7c     | 29.9 $\pm$ 0.8d  | 31.3 $\pm$ 0.9c |
| K <sub>3</sub> $\times$ S <sub>2</sub> | 0.85 $\pm$ 0.001a   | 8.33 $\pm$ 0.53a    | 8.40 $\pm$ 0.62a    | 57.2 $\pm$ 1.5a     | 58.0 $\pm$ 0.5b     | 32.2 $\pm$ 0.7b  | 32.1 $\pm$ 0.7b |
| K <sub>3</sub> $\times$ S <sub>3</sub> | 0.86 $\pm$ 0.002a   | 9.24 $\pm$ 0.50a    | 9.17 $\pm$ 0.78a    | 60.4 $\pm$ 1.4a     | 61.5 $\pm$ 2.0a     | 35.8 $\pm$ 0.8a  | 36.4 $\pm$ 1.0a |
| <b>P-value</b>                         |                     |                     |                     |                     |                     |                  |                 |
| D $\times$ K                           | 0.017*              | 0.011*              | 0.035*              | 0.044*              | 0.002**             | 0.031*           | 0.044*          |
| D $\times$ S                           | 0.072 <sup>ns</sup> | <.001**             | <.001**             | 0.028**             | 0.021*              | 0.009**          | <.001**         |
| K $\times$ S                           | 0.321 <sup>ns</sup> | 0.086 <sup>ns</sup> | 0.883 <sup>ns</sup> | 0.098 <sup>ns</sup> | 0.003**             | <.001**          | <.001**         |
| D $\times$ K $\times$ S                | 0.361 <sup>ns</sup> | 0.855 <sup>ns</sup> | 0.982 <sup>ns</sup> | 0.363**             | 0.256 <sup>ns</sup> | <.001**          | <.001**         |
| C.V. (%)                               | 0.3                 | 3.9                 | 3.8                 | 3.3                 | 2.5                 | 2.2              | 1.3             |

"ns" indicate non-significant variation. Means sharing the same letter in each column are not significantly. D<sub>1</sub>= Sowing at the 1<sup>st</sup> of September, D<sub>2</sub>= Sowing at the 1<sup>st</sup> of October, K<sub>1</sub>= 60 kg K<sub>2</sub>O ha<sup>-1</sup>, K<sub>2</sub>= 120 kg K<sub>2</sub>O ha<sup>-1</sup>, K<sub>3</sub>= 180 kg K<sub>2</sub>O ha<sup>-1</sup>, S<sub>1</sub>= 175 kg CaSO<sub>4</sub> ha<sup>-1</sup>, S<sub>2</sub>= 350 kg CaSO<sub>4</sub> ha<sup>-1</sup>, and S<sub>3</sub>= 525 kg CaSO<sub>4</sub> ha<sup>-1</sup>.

**Table S2.** Root diameter, root fresh weight, and top fresh weight of sugar beet as affected by the interactions of sowing date (D), potassium (K) and sulphur (S), during two growing seasons (Mean  $\pm$  SE) under soil salinity (ECe = 8.96 dS m<sup>-1</sup>) conditions

| Treatments                             | Root diameter (cm) |                    | Root FW (kg plant <sup>-1</sup> ) |                   | Top FW (kg plant <sup>-1</sup> ) |                  |
|----------------------------------------|--------------------|--------------------|-----------------------------------|-------------------|----------------------------------|------------------|
|                                        | 2018/2019          | 2019/2020          | 2018/2019                         | 2019/2020         | 2018/2019                        | 2019/2020        |
| <b>D <math>\times</math> K</b>         |                    |                    |                                   |                   |                                  |                  |
| D <sub>1</sub> $\times$ K <sub>1</sub> | 12.47 $\pm$ 0.92b  | 13.10 $\pm$ 0.04c  | 1.34 $\pm$ 0.09bc                 | 1.34 $\pm$ 0.02c  | 0.84 $\pm$ 0.10f                 | 0.93 $\pm$ 0.01c |
| D <sub>1</sub> $\times$ K <sub>2</sub> | 12.99 $\pm$ 0.20b  | 13.51 $\pm$ 0.15b  | 1.38 $\pm$ 0.46b                  | 1.39 $\pm$ 0.02b  | 0.94 $\pm$ 0.03b                 | 0.99 $\pm$ 0.02b |
| D <sub>1</sub> $\times$ K <sub>3</sub> | 15.34 $\pm$ 0.26a  | 16.05 $\pm$ 0.59a  | 1.69 $\pm$ 0.26a                  | 1.66 $\pm$ 0.07a  | 1.18 $\pm$ 0.03a                 | 1.25 $\pm$ 0.07a |
| D <sub>2</sub> $\times$ K <sub>1</sub> | 10.97 $\pm$ 1.35c  | 11.84 $\pm$ 1.91d  | 1.14 $\pm$ 1.43e                  | 1.19 $\pm$ 0.20e  | 0.72 $\pm$ 0.09e                 | 0.78 $\pm$ 0.13f |
| D <sub>2</sub> $\times$ K <sub>2</sub> | 11.61 $\pm$ 0.36c  | 12.29 $\pm$ 0.11c  | 1.21 $\pm$ 0.42d                  | 1.26 $\pm$ 0.02d  | 0.79 $\pm$ 0.02d                 | 0.84 $\pm$ 0.02e |
| D <sub>2</sub> $\times$ K <sub>3</sub> | 12.48 $\pm$ 0.26b  | 13.03 $\pm$ 0.25c  | 1.27 $\pm$ 0.34cd                 | 1.36 $\pm$ 0.03bc | 0.84 $\pm$ 0.02c                 | 0.89 $\pm$ 0.03d |
| <b>D <math>\times</math> S</b>         |                    |                    |                                   |                   |                                  |                  |
| D <sub>1</sub> $\times$ S <sub>1</sub> | 12.31 $\pm$ 0.21c  | 13.14 $\pm$ 0.38c  | 1.34 $\pm$ 0.03c                  | 1.34 $\pm$ 0.03c  | 0.83 $\pm$ 0.03c                 | 0.91 $\pm$ 0.04c |
| D <sub>1</sub> $\times$ S <sub>2</sub> | 13.31 $\pm$ 1.43b  | 13.98 $\pm$ 1.78b  | 1.43 $\pm$ 0.16b                  | 1.44 $\pm$ 0.20b  | 0.96 $\pm$ 0.11b                 | 1.03 $\pm$ 0.16b |
| D <sub>1</sub> $\times$ S <sub>3</sub> | 15.18 $\pm$ 0.94a  | 15.54 $\pm$ 0.14a  | 1.65 $\pm$ 0.10a                  | 1.61 $\pm$ 0.02a  | 1.17 $\pm$ 0.10a                 | 1.23 $\pm$ 0.02a |
| D <sub>2</sub> $\times$ S <sub>1</sub> | 10.89 $\pm$ 0.32e  | 11.58 $\pm$ 0.15e  | 1.12 $\pm$ 0.04e                  | 1.18 $\pm$ 0.02e  | 0.71 $\pm$ 0.02e                 | 0.76 $\pm$ 0.02e |
| D <sub>2</sub> $\times$ S <sub>2</sub> | 11.61 $\pm$ 0.32d  | 12.47 $\pm$ 0.15d  | 1.20 $\pm$ 0.04d                  | 1.28 $\pm$ 0.02d  | 0.78 $\pm$ 0.02d                 | 0.84 $\pm$ 0.02d |
| D <sub>2</sub> $\times$ S <sub>3</sub> | 12.56 $\pm$ 0.31c  | 13.12 $\pm$ 0.52c  | 1.30 $\pm$ 0.03c                  | 1.35 $\pm$ 0.05c  | 0.85 $\pm$ 0.02c                 | 0.91 $\pm$ 0.04c |
| <b>K <math>\times</math> S</b>         |                    |                    |                                   |                   |                                  |                  |
| K <sub>1</sub> $\times$ S <sub>1</sub> | 11.01 $\pm$ 0.42e  | 11.70 $\pm$ 0.52f  | 1.15 $\pm$ 0.08f                  | 1.18 $\pm$ 0.05f  | 0.70 $\pm$ 0.04e                 | 0.78 $\pm$ 0.07e |
| K <sub>1</sub> $\times$ S <sub>2</sub> | 11.75 $\pm$ 0.48d  | 12.38 $\pm$ 1.08e  | 1.23 $\pm$ 0.08e                  | 1.28 $\pm$ 0.12e  | 0.79 $\pm$ 0.07d                 | 0.86 $\pm$ 0.14d |
| K <sub>1</sub> $\times$ S <sub>3</sub> | 12.41 $\pm$ 0.14c  | 13.34 $\pm$ 0.05c  | 1.33 $\pm$ 0.03cd                 | 1.35 $\pm$ 0.02d  | 0.85 $\pm$ 0.04c                 | 0.93 $\pm$ 0.01c |
| K <sub>2</sub> $\times$ S <sub>1</sub> | 11.53 $\pm$ 0.37d  | 12.12 $\pm$ 0.25e  | 1.22 $\pm$ 0.06e                  | 1.25 $\pm$ 0.04e  | 0.79 $\pm$ 0.03d                 | 0.83 $\pm$ 0.04d |
| K <sub>2</sub> $\times$ S <sub>2</sub> | 12.35 $\pm$ 0.50c  | 13.00 $\pm$ 0.29d  | 1.29 $\pm$ 0.06d                  | 1.32 $\pm$ 0.03d  | 0.86 $\pm$ 0.04c                 | 0.92 $\pm$ 0.04c |
| K <sub>2</sub> $\times$ S <sub>3</sub> | 13.02 $\pm$ 0.38b  | 13.58 $\pm$ 0.32c  | 1.38 $\pm$ 0.06bc                 | 1.40 $\pm$ 0.04c  | 0.96 $\pm$ 0.05b                 | 1.00 $\pm$ 0.04b |
| K <sub>3</sub> $\times$ S <sub>1</sub> | 12.26 $\pm$ 0.37c  | 13.28 $\pm$ 0.35cd | 1.32 $\pm$ 0.05cd                 | 1.36 $\pm$ 0.04cd | 0.83 $\pm$ 0.03cd                | 0.90 $\pm$ 0.04c |
| K <sub>3</sub> $\times$ S <sub>2</sub> | 13.29 $\pm$ 0.44b  | 14.30 $\pm$ 0.27b  | 1.42 $\pm$ 0.05b                  | 1.47 $\pm$ 0.03b  | 0.97 $\pm$ 0.03b                 | 1.03 $\pm$ 0.04b |
| K <sub>3</sub> $\times$ S <sub>3</sub> | 16.18 $\pm$ 0.30a  | 16.05 $\pm$ 0.50a  | 1.70 $\pm$ 0.05a                  | 1.69 $\pm$ 0.04a  | 1.23 $\pm$ 0.04a                 | 1.28 $\pm$ 0.04a |
| <b>P-value</b>                         |                    |                    |                                   |                   |                                  |                  |
| D $\times$ K                           | 0.08*              | <.001**            | 0.011*                            | 0.005**           | <.001**                          | <.001**          |
| D $\times$ S                           | <.001**            | <.001**            | <.001**                           | <.001**           | <.001**                          | <.001**          |
| K $\times$ S                           | <.001**            | <.001**            | <.001**                           | <.001**           | <.001**                          | <.001**          |
| D $\times$ K $\times$ S                | <.001**            | <.001**            | <.001**                           | <.001**           | <.001**                          | <.001**          |
| C.V. (%)                               | 3.1                | 2.0                | 3.5                               | 2.4               | 3.9                              | 2.7              |

"ns" indicate non-significant variation. Means sharing the same letter in each column are not significantly. D<sub>1</sub>= Sowing at the 1<sup>st</sup> of September, D<sub>2</sub>= Sowing at the 1<sup>st</sup> of October, K<sub>1</sub>= 60 kg K<sub>2</sub>O ha<sup>-1</sup>, K<sub>2</sub>= 120 kg K<sub>2</sub>O ha<sup>-1</sup>, K<sub>3</sub>= 180 kg K<sub>2</sub>O ha<sup>-1</sup>, S<sub>1</sub>= 175 kg CaSO<sub>4</sub> ha<sup>-1</sup>, S<sub>2</sub>= 350 kg CaSO<sub>4</sub> ha<sup>-1</sup>, S<sub>3</sub>= 525 kg CaSO<sub>4</sub> ha<sup>-1</sup>, and FW= Fresh weight.

**Table S3.** Leaf area index (LAI), biological yield, harvest index, and purity content of sugar beet as affected by the interactions of sowing date (D), potassium (K) and sulphur (S), during two growing seasons (Mean  $\pm$  SE) under soil salinity ( $\text{ECe} = 8.96 \text{ dS m}^{-1}$ ) conditions

| Treatments                                             | LAI               |                   | Biological yield ( $\text{Mg ha}^{-1}$ ) |                    | Harvest index     | Purity (%)          |
|--------------------------------------------------------|-------------------|-------------------|------------------------------------------|--------------------|-------------------|---------------------|
|                                                        | 2018/2019         | 2019/2020         | 2018/2019                                | 2019/2020          | 2019/2020         | 2019/2020           |
| <b>D <math>\times</math> K</b>                         |                   |                   |                                          |                    |                   |                     |
| <b>D<sub>1</sub> <math>\times</math> K<sub>1</sub></b> | 4.27 $\pm$ 0.59c  | 4.44 $\pm$ 0.07c  | 104.08 $\pm$ 1.91c                       | 106.15 $\pm$ 0.46c | 0.72 $\pm$ 0.01d  | 87.31 $\pm$ 0.03d   |
| <b>D<sub>1</sub> <math>\times</math> K<sub>2</sub></b> | 4.66 $\pm$ 0.27bc | 4.82 $\pm$ 0.29b  | 111.07 $\pm$ 0.45b                       | 111.55 $\pm$ 0.34b | 0.72 $\pm$ 0.01d  | 89.80 $\pm$ 0.33b   |
| <b>D<sub>1</sub> <math>\times</math> K<sub>3</sub></b> | 6.76 $\pm$ 0.18a  | 6.68 $\pm$ 0.45a  | 126.47 $\pm$ 0.57a                       | 126.83 $\pm$ 1.62a | 0.74 $\pm$ 0.01c  | 91.26 $\pm$ 0.63a   |
| <b>D<sub>2</sub> <math>\times</math> K<sub>1</sub></b> | 4.26 $\pm$ 0.56c  | 4.47 $\pm$ 0.64bc | 80.35 $\pm$ 4.33f                        | 80.16 $\pm$ 5.95f  | 0.78 $\pm$ 0.13a  | 84.47 $\pm$ 14.77e  |
| <b>D<sub>2</sub> <math>\times</math> K<sub>2</sub></b> | 4.50 $\pm$ 0.21c  | 4.40 $\pm$ 0.23c  | 90.37 $\pm$ 0.52e                        | 88.82 $\pm$ 0.41e  | 0.76 $\pm$ 0.01b  | 87.85 $\pm$ 0.36c   |
| <b>D<sub>2</sub> <math>\times</math> K<sub>3</sub></b> | 4.95 $\pm$ 0.19b  | 4.74 $\pm$ 0.22bc | 97.08 $\pm$ 0.47d                        | 96.46 $\pm$ 0.95d  | 0.74 $\pm$ 0.01c  | 89.95 $\pm$ 0.86b   |
| <b>D <math>\times</math> S</b>                         |                   |                   |                                          |                    |                   |                     |
| <b>D<sub>1</sub> <math>\times</math> S<sub>1</sub></b> | 4.32 $\pm$ 0.25cd | 4.49 $\pm$ 0.33c  | 107.41 $\pm$ 0.92c                       | 108.62 $\pm$ 1.03c | 0.72 $\pm$ 0.01e  | 90.13 $\pm$ 0.58a   |
| <b>D<sub>1</sub> <math>\times</math> S<sub>2</sub></b> | 5.02 $\pm$ 0.65b  | 5.03 $\pm$ 0.83b  | 112.48 $\pm$ 5.09b                       | 113.53 $\pm$ 5.80b | 0.72 $\pm$ 0.08e  | 89.76 $\pm$ 9.35a   |
| <b>D<sub>1</sub> <math>\times</math> S<sub>3</sub></b> | 6.35 $\pm$ 0.62a  | 6.42 $\pm$ 0.10a  | 121.74 $\pm$ 2.37a                       | 122.38 $\pm$ 0.98a | 0.74 $\pm$ 0.01d  | 88.49 $\pm$ 0.38a   |
| <b>D<sub>2</sub> <math>\times</math> S<sub>1</sub></b> | 4.05 $\pm$ 0.13d  | 3.91 $\pm$ 0.14d  | 86.04 $\pm$ 1.06f                        | 84.89 $\pm$ 1.04f  | 0.77 $\pm$ 0.01a  | 88.20 $\pm$ 0.91a   |
| <b>D<sub>2</sub> <math>\times</math> S<sub>2</sub></b> | 4.47 $\pm$ 0.13c  | 4.45 $\pm$ 0.14c  | 88.99 $\pm$ 1.06e                        | 88.39 $\pm$ 1.04e  | 0.76 $\pm$ 0.01b  | 87.82 $\pm$ 0.91a   |
| <b>D<sub>2</sub> <math>\times</math> S<sub>3</sub></b> | 5.18 $\pm$ 0.20b  | 5.25 $\pm$ 0.28b  | 92.75 $\pm$ 1.06d                        | 92.25 $\pm$ 2.17d  | 0.75 $\pm$ 0.01c  | 86.25 $\pm$ 0.89a   |
| <b>K <math>\times</math> S</b>                         |                   |                   |                                          |                    |                   |                     |
| <b>K<sub>1</sub> <math>\times</math> S<sub>1</sub></b> | 3.77 $\pm$ 0.29e  | 3.84 $\pm$ 0.38f  | 88.66 $\pm$ 1.98g                        | 89.92 $\pm$ 2.47g  | 0.76 $\pm$ 0.01a  | 86.93 $\pm$ 0.27a   |
| <b>K<sub>1</sub> <math>\times</math> S<sub>2</sub></b> | 4.19 $\pm$ 0.44de | 4.37 $\pm$ 0.68e  | 92.25 $\pm$ 2.37f                        | 93.25 $\pm$ 4.03f  | 0.75 $\pm$ 0.02ab | 86.18 $\pm$ 0.30a   |
| <b>K<sub>1</sub> <math>\times</math> S<sub>3</sub></b> | 4.83 $\pm$ 0.15c  | 5.14 $\pm$ 0.09c  | 95.75 $\pm$ 0.69e                        | 96.32 $\pm$ 0.56e  | 0.74 $\pm$ 0.01bc | 84.55 $\pm$ 0.04a   |
| <b>K<sub>2</sub> <math>\times</math> S<sub>1</sub></b> | 4.07 $\pm$ 0.14de | 4.03 $\pm$ 0.16f  | 97.25 $\pm$ 1.98e                        | 96.37 $\pm$ 2.16e  | 0.75 $\pm$ 0.01ab | 89.49 $\pm$ 0.46a   |
| <b>K<sub>2</sub> <math>\times</math> S<sub>2</sub></b> | 4.41 $\pm$ 0.11cd | 4.36 $\pm$ 0.21e  | 101.08 $\pm$ 2.07d                       | 100.25 $\pm$ 2.15d | 0.74 $\pm$ 0.01bc | 89.23 $\pm$ 0.54a   |
| <b>K<sub>2</sub> <math>\times</math> S<sub>3</sub></b> | 5.25 $\pm$ 0.25b  | 5.44 $\pm$ 0.09b  | 103.79 $\pm$ 1.91c                       | 103.93 $\pm$ 2.41c | 0.73 $\pm$ 0.02c  | 87.75 $\pm$ 0.56a   |
| <b>K<sub>3</sub> <math>\times</math> S<sub>1</sub></b> | 4.71 $\pm$ 0.09c  | 4.74 $\pm$ 0.19d  | 104.27 $\pm$ 2.17c                       | 104.01 $\pm$ 2.55c | 0.74 $\pm$ 0.02bc | 91.06 $\pm$ 0.66a   |
| <b>K<sub>3</sub> <math>\times</math> S<sub>2</sub></b> | 5.64 $\pm$ 0.15b  | 5.48 $\pm$ 0.13b  | 108.86 $\pm$ 2.34b                       | 109.41 $\pm$ 2.40b | 0.73 $\pm$ 0.01c  | 90.96 $\pm$ 0.74a   |
| <b>K<sub>3</sub> <math>\times</math> S<sub>3</sub></b> | 7.21 $\pm$ 0.12a  | 6.92 $\pm$ 0.30a  | 122.17 $\pm$ 2.16a                       | 121.55 $\pm$ 2.01a | 0.76 $\pm$ 0.01a  | 89.81 $\pm$ 0.45a   |
| <b>P-value</b>                                         |                   |                   |                                          |                    |                   |                     |
| <b>D <math>\times</math> K</b>                         | 0.001**           | 0.001**           | 0.016*                                   | 0.031*             | 0.015*            | 0.007**             |
| <b>D <math>\times</math> S</b>                         | 0.002**           | 0.001**           | <.001**                                  | <.001**            | <.001**           | 0.120 <sup>ns</sup> |
| <b>K <math>\times</math> S</b>                         | <.001**           | 0.001**           | <.001**                                  | <.001**            | <.001**           | 0.112 <sup>ns</sup> |
| <b>D <math>\times</math> K <math>\times</math> S</b>   | 0.001**           | 0.001**           | <.001**                                  | <.001**            | <.001**           | 0.066 <sup>ns</sup> |
| <b>C.V. (%)</b>                                        | 7.0               | 4.9               | 1.8                                      | 1.3                | 1.3               | 0.3                 |

"ns" indicate non-significant variation. Means sharing the same letter in each column are not significantly. D<sub>1</sub>= Sowing at the 1<sup>st</sup> of September, D<sub>2</sub>= Sowing at the 1<sup>st</sup> of October, K<sub>1</sub>= 60 kg K<sub>2</sub>O ha<sup>-1</sup>, K<sub>2</sub>= 120 kg K<sub>2</sub>O ha<sup>-1</sup>, K<sub>3</sub>= 180 kg K<sub>2</sub>O ha<sup>-1</sup>, S<sub>1</sub>= 175 kg CaSO<sub>4</sub> ha<sup>-1</sup>, S<sub>2</sub>= 350 kg CaSO<sub>4</sub> ha<sup>-1</sup>, and S<sub>3</sub>= 525 kg CaSO<sub>4</sub> ha<sup>-1</sup>.

**Table S4.** Root yield, and top yield of sugar beet as affected by the interactions of sowing date (D), potassium (K) and sulphur (S), during two growing seasons (Mean  $\pm$  SE) under soil salinity (ECe = 8.96 dS m<sup>-1</sup>) conditions

| Treatments                             | Root yield (Mg ha <sup>-1</sup> ) |                   | Top yield (Mg ha <sup>-1</sup> ) |                     |
|----------------------------------------|-----------------------------------|-------------------|----------------------------------|---------------------|
|                                        | 2018/2019                         | 2019/2020         | 2018/2019                        | 2019/2020           |
| <b>D <math>\times</math> K</b>         |                                   |                   |                                  |                     |
| D <sub>1</sub> $\times$ K <sub>1</sub> | 77.11 $\pm$ 1.34c                 | 76.30 $\pm$ 0.39c | 26.97 $\pm$ 0.61c                | 29.85 $\pm$ 0.08c   |
| D <sub>1</sub> $\times$ K <sub>2</sub> | 80.85 $\pm$ 0.24b                 | 79.78 $\pm$ 0.30b | 30.23 $\pm$ 0.23b                | 31.77 $\pm$ 0.05b   |
| D <sub>1</sub> $\times$ K <sub>3</sub> | 92.72 $\pm$ 0.38a                 | 91.89 $\pm$ 1.26a | 33.77 $\pm$ 0.24a                | 34.94 $\pm$ 0.40a   |
| D <sub>2</sub> $\times$ K <sub>1</sub> | 63.21 $\pm$ 3.40e                 | 62.74 $\pm$ 4.61f | 17.14 $\pm$ 0.97f                | 17.42 $\pm$ 1.35f   |
| D <sub>2</sub> $\times$ K <sub>2</sub> | 71.40 $\pm$ 0.52d                 | 67.78 $\pm$ 0.35e | 18.97 $\pm$ 0.30e                | 21.04 $\pm$ 0.21e   |
| D <sub>2</sub> $\times$ K <sub>3</sub> | 76.49 $\pm$ 0.44c                 | 71.82 $\pm$ 0.56d | 20.56 $\pm$ 0.28d                | 24.63 $\pm$ 0.44d   |
| <b>D <math>\times</math> S</b>         |                                   |                   |                                  |                     |
| D <sub>1</sub> $\times$ S <sub>1</sub> | 79.66 $\pm$ 0.61c                 | 78.47 $\pm$ 0.78c | 27.75 $\pm$ 0.35c                | 30.15 $\pm$ 0.31c   |
| D <sub>1</sub> $\times$ S <sub>2</sub> | 82.40 $\pm$ 3.72b                 | 81.35 $\pm$ 4.24b | 30.08 $\pm$ 1.38b                | 32.18 $\pm$ 1.58b   |
| D <sub>1</sub> $\times$ S <sub>3</sub> | 88.61 $\pm$ 1.75a                 | 88.16 $\pm$ 0.57a | 33.13 $\pm$ 0.65a                | 34.22 $\pm$ 0.47a   |
| D <sub>2</sub> $\times$ S <sub>1</sub> | 68.69 $\pm$ 0.88f                 | 65.47 $\pm$ 0.60f | 17.11 $\pm$ 0.34f                | 19.42 $\pm$ 0.48f   |
| D <sub>2</sub> $\times$ S <sub>2</sub> | 70.19 $\pm$ 0.88e                 | 67.50 $\pm$ 0.60e | 18.80 $\pm$ 0.34e                | 20.90 $\pm$ 0.48e   |
| D <sub>2</sub> $\times$ S <sub>3</sub> | 72.23 $\pm$ 0.89d                 | 69.38 $\pm$ 1.28d | 20.52 $\pm$ 0.31d                | 22.78 $\pm$ 0.90d   |
| <b>K <math>\times</math> S</b>         |                                   |                   |                                  |                     |
| K <sub>1</sub> $\times$ S <sub>1</sub> | 68.28 $\pm$ 0.93h                 | 67.83 $\pm$ 1.55g | 20.37 $\pm$ 1.09f                | 22.09 $\pm$ 0.95g   |
| K <sub>1</sub> $\times$ S <sub>2</sub> | 70.21 $\pm$ 1.22g                 | 69.54 $\pm$ 2.90f | 22.04 $\pm$ 1.20e                | 23.70 $\pm$ 1.15f   |
| K <sub>1</sub> $\times$ S <sub>3</sub> | 72.00 $\pm$ 0.68f                 | 71.21 $\pm$ 0.48e | 23.75 $\pm$ 0.28cd               | 25.11 $\pm$ 0.10e   |
| K <sub>2</sub> $\times$ S <sub>1</sub> | 74.49 $\pm$ 1.02e                 | 71.71 $\pm$ 1.17e | 22.75 $\pm$ 1.07de               | 24.66 $\pm$ 1.04ef  |
| K <sub>2</sub> $\times$ S <sub>2</sub> | 76.30 $\pm$ 1.05d                 | 73.64 $\pm$ 1.22d | 24.78 $\pm$ 1.11c                | 26.61 $\pm$ 0.98d   |
| K <sub>2</sub> $\times$ S <sub>3</sub> | 77.56 $\pm$ 0.92d                 | 75.97 $\pm$ 1.30c | 26.25 $\pm$ 1.07b                | 27.97 $\pm$ 1.15c   |
| K <sub>3</sub> $\times$ S <sub>1</sub> | 79.75 $\pm$ 1.36c                 | 76.37 $\pm$ 1.33c | 24.54 $\pm$ 0.88c                | 27.63 $\pm$ 1.25cd  |
| K <sub>3</sub> $\times$ S <sub>2</sub> | 82.35 $\pm$ 1.41b                 | 80.09 $\pm$ 1.27b | 26.51 $\pm$ 0.99b                | 29.32 $\pm$ 1.16b   |
| K <sub>3</sub> $\times$ S <sub>3</sub> | 91.73 $\pm$ 1.27a                 | 89.11 $\pm$ 1.31a | 30.46 $\pm$ 0.96a                | 32.44 $\pm$ 0.72a   |
| <b>P-value</b>                         |                                   |                   |                                  |                     |
| D $\times$ K                           | 0.019*                            | 0.008**           | 0.011*                           | 0.445 <sup>ns</sup> |
| D $\times$ S                           | <.001**                           | <.001**           | 0.015*                           | 0.100 <sup>ns</sup> |
| K $\times$ S                           | <.001**                           | <.001**           | 0.022*                           | <.001**             |
| D $\times$ K $\times$ S                | <.001**                           | <.001**           | 0.009**                          | <.001**             |
| C.V. (%)                               | 1.9                               | 1.3               | 4.3                              | 1.8                 |

"ns" indicate non-significant variation. Means sharing the same letter in each column are not significantly. D<sub>1</sub>= Sowing at the 1<sup>st</sup> of September, D<sub>2</sub>= Sowing at the 1<sup>st</sup> of October, K<sub>1</sub>= 60 kg K<sub>2</sub>O ha<sup>-1</sup>, K<sub>2</sub>= 120 kg K<sub>2</sub>O ha<sup>-1</sup>, K<sub>3</sub>= 180 kg K<sub>2</sub>O ha<sup>-1</sup>, S<sub>1</sub>= 175 kg CaSO<sub>4</sub> ha<sup>-1</sup>, S<sub>2</sub>= 350 kg CaSO<sub>4</sub> ha<sup>-1</sup>, and S<sub>3</sub>= 525 kg CaSO<sub>4</sub> ha<sup>-1</sup>.

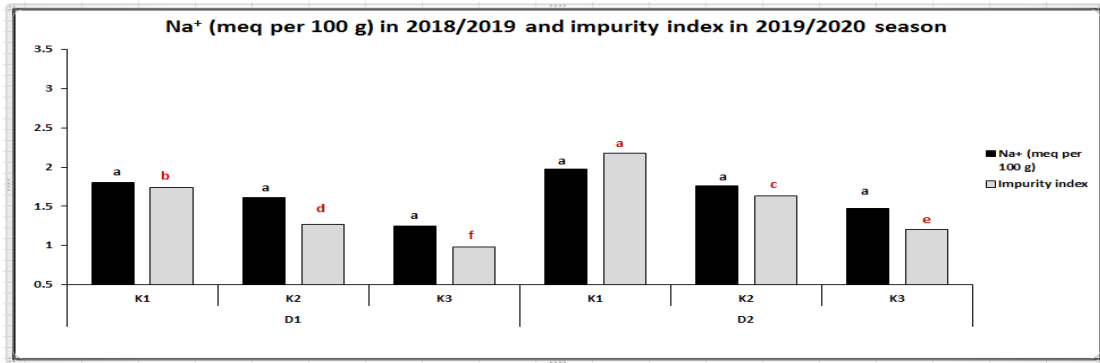

**Figure S1.** Na<sup>+</sup> (meq per 100 g) in 2018/2019 season and impurity index in 2019/2020 season of sugar beet as affected by the interactions of sowing dates (D) and potassium (K), (Mean ± SE) under soil salinity (ECe = 8.96 dS m<sup>-1</sup>) conditions.

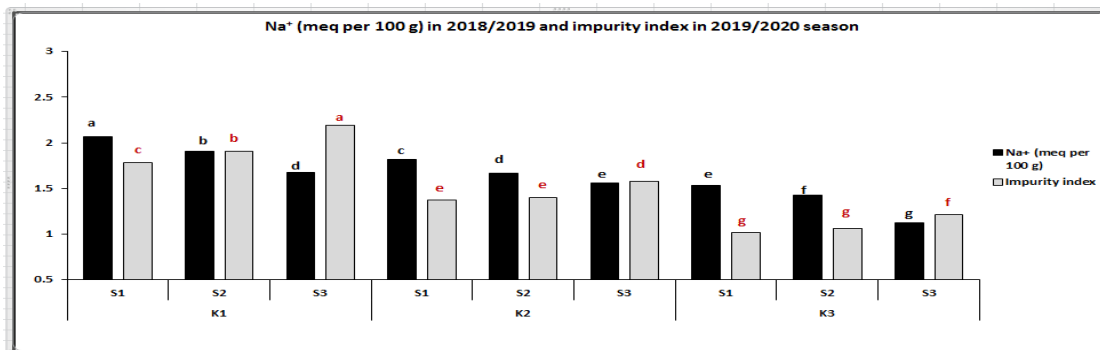

**Figure S2.** Na<sup>+</sup> (meq per 100 g) in 2018/2019 season and impurity index in 2019/2020 season of sugar beet as affected by the interactions of potassium (K) and sulphure (S), (Mean ± SE) under soil salinity (ECe = 8.96 dS m<sup>-1</sup>) conditions.

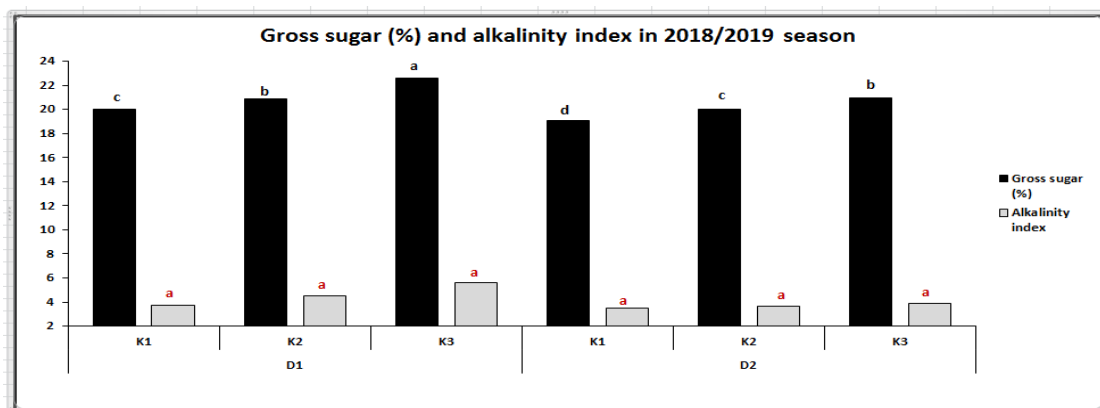

**Figure S3.** Gross sugar (%) and alkalinity index of sugar beet as affected by the interactions of sowing dates (D) and potassium (K), in 2018/2019 season (Mean ± SE) under soil salinity (ECe = 8.96 dS m<sup>-1</sup>) conditions.

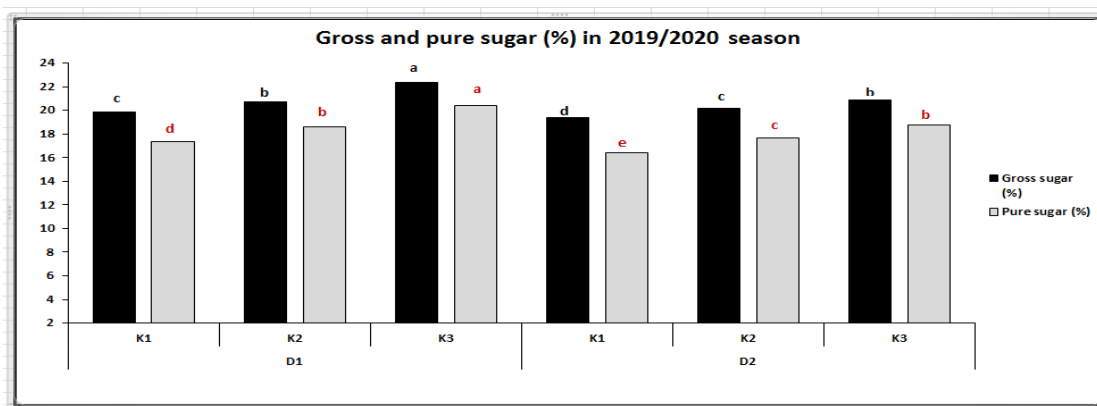

**Figure S4.** Gross and pure sugar (%) of sugar beet as affected by the interactions of sowing dates (D) and potassium (K), in 2019/2020 season (Mean  $\pm$  SE) under soil salinity ( $E_{ce} = 8.96$  dS  $m^{-1}$ ) conditions.

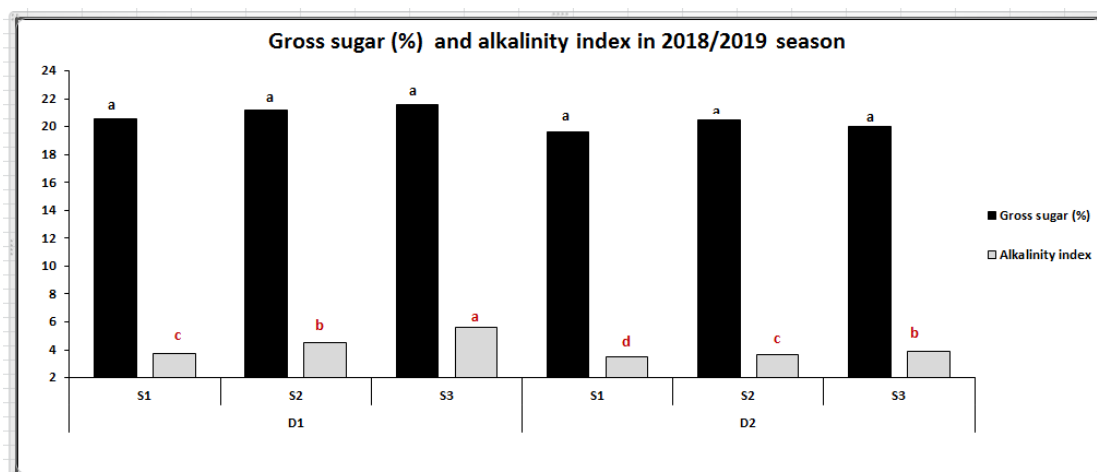

**Figure S5.** Gross sugar (%) and alkalinity index of sugar beet as affected by the interactions of sowing dates (D) and sulphure (S),in 2018/2019 season, (Mean  $\pm$  SE) under soil salinity ( $E_{ce} = 8.96$  dS  $m^{-1}$ ) conditions.

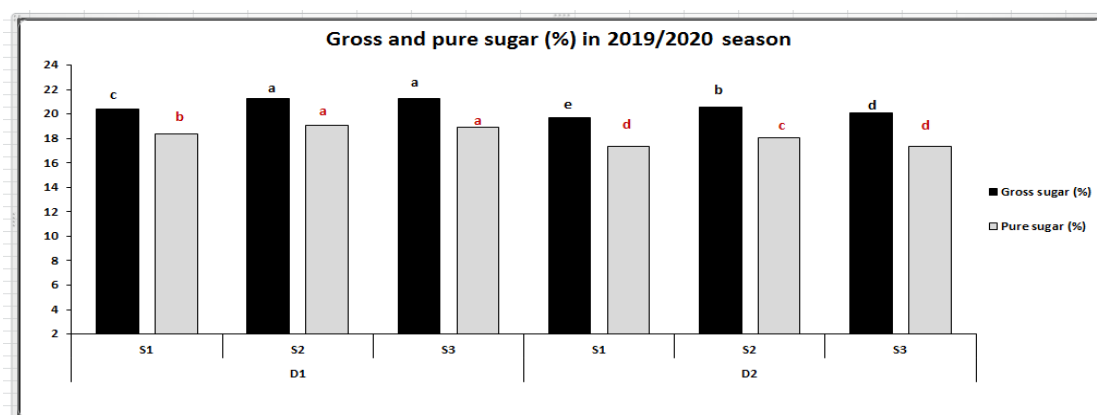

**Figure S6.** Gross and pure sugar (%) of sugar beet as affected by the interactions of sowing dates (D) and sulphure (S), in 2019/2020 season (Mean  $\pm$  SE) under soil salinity ( $E_{ce} = 8.96$  dS  $m^{-1}$ ) conditions.

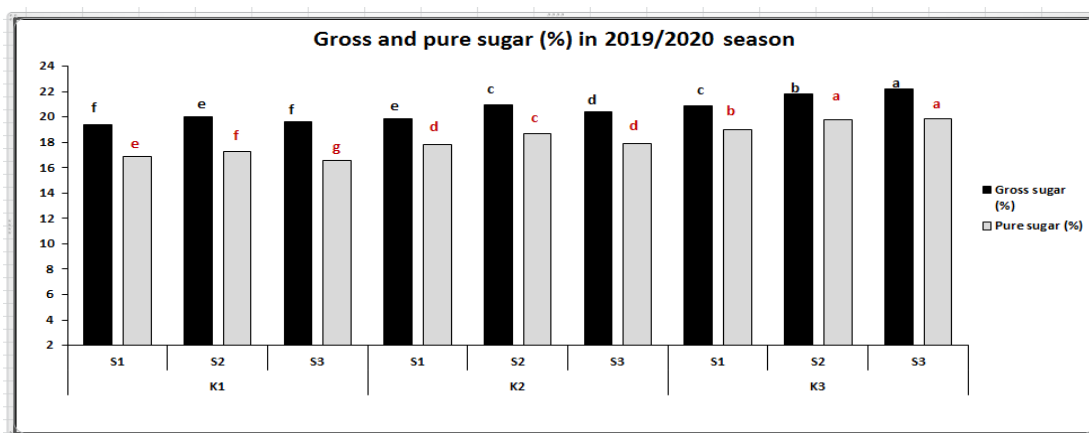

**Figure S7.** Gross and pure sugar (%) of sugar beet as affected by the interactions of potassium (K) and sulphure (S), in 2019/2020 season (Mean  $\pm$  SE) under soil salinity ( $E_{ce} = 8.96 \text{ dS m}^{-1}$ ) conditions.

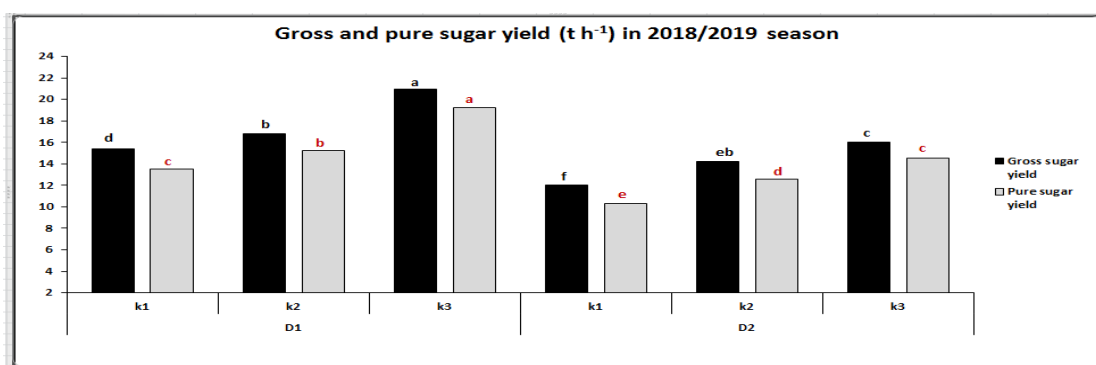

**Figure S8.** Gross and pure sugar yield ( $\text{t h}^{-1}$ ) of sugar beet as affected by the interactions of sowing dates (d) and potassium (K), in 2018/2019 season (Mean  $\pm$  SE) under soil salinity ( $E_{ce} = 8.96 \text{ dS m}^{-1}$ ) conditions.

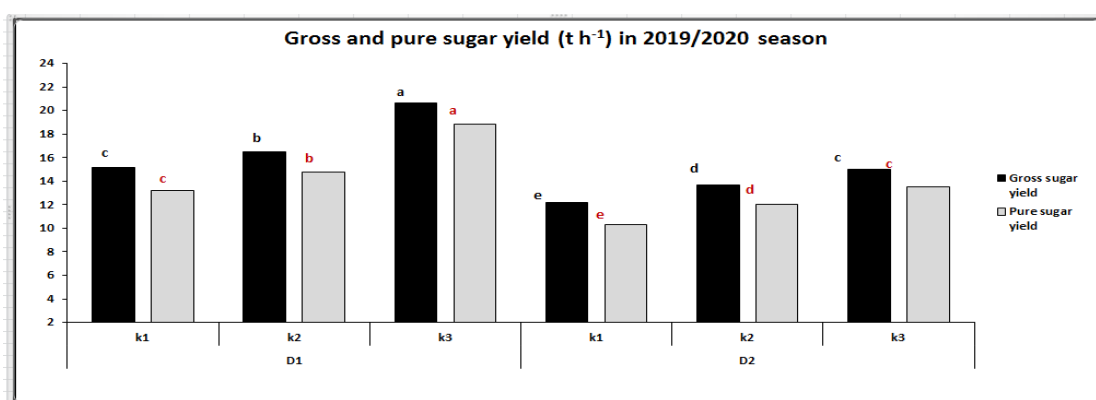

**Figure S9.** Gross and pure sugar yield ( $\text{t h}^{-1}$ ) of sugar beet as affected by the interactions of sowing dates (d) and potassium (K), in 2019/2020 season (Mean  $\pm$  SE) under soil salinity ( $E_{ce} = 8.96 \text{ dS m}^{-1}$ ) conditions.

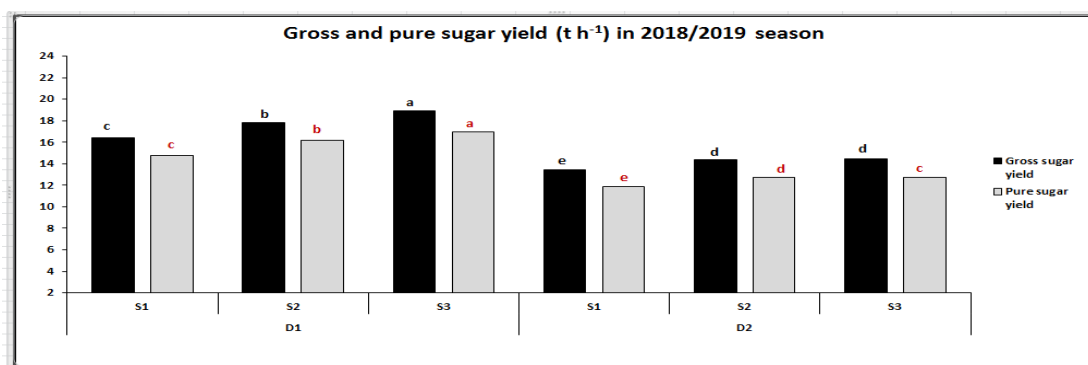

**Figure S10.** Gross and pure sugar yield (Mg h<sup>-1</sup>) of sugar beet as affected by the interactions of sowing dates (d) and sulphure (S), in 2018/2019 season (Mean ± SE) under soil salinity (ECe = 8.96 dS m<sup>-1</sup>) conditions.

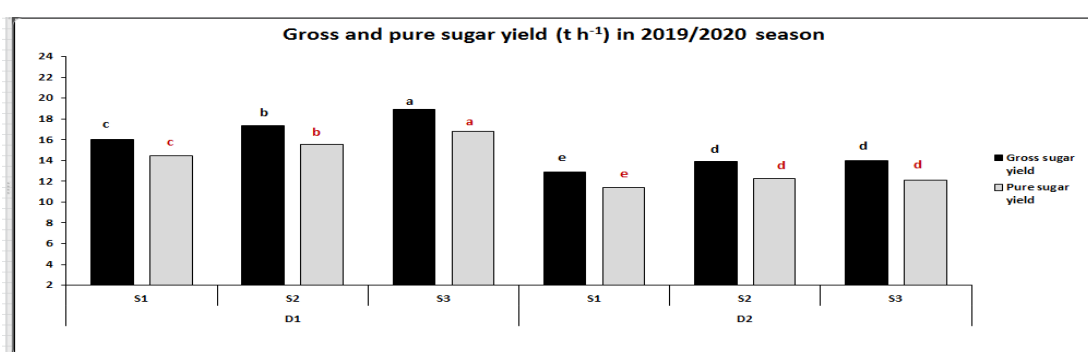

**Figure S11.** Gross and pure sugar yield (Mg h<sup>-1</sup>) of sugar beet as affected by the interactions of sowing dates (d) and sulphure (S), in 2019/2020 season (Mean ± SE) under soil salinity (ECe = 8.96 dS m<sup>-1</sup>) conditions.

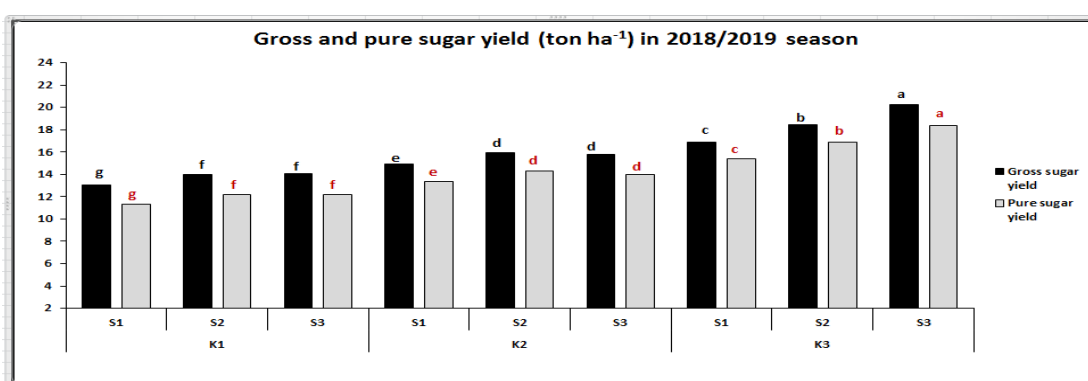

**Figure S12.** Gross and pure sugar yield (Mg h<sup>-1</sup>) of sugar beet as affected by the interactions of potassium (K) and sulphure (S), in 2018/2019 season (Mean ± SE) under soil salinity (ECe = 8.96 dS m<sup>-1</sup>) conditions.



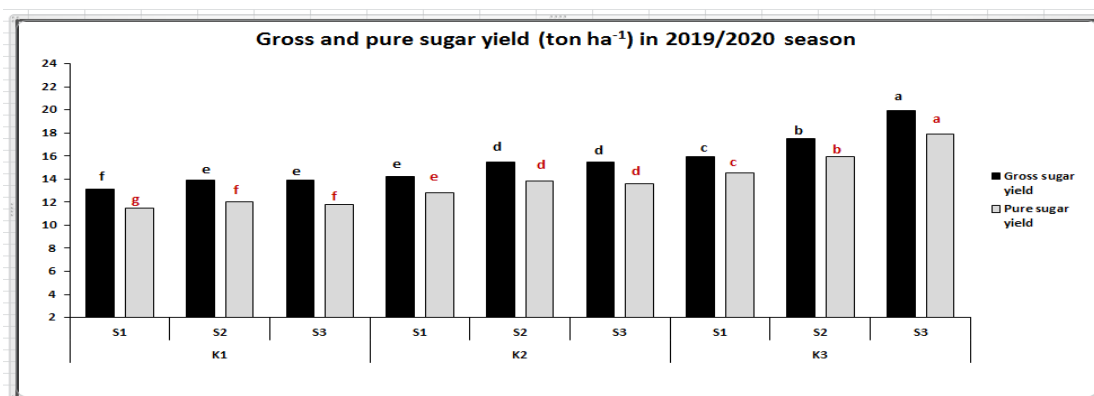

**Figure S13.** Gross and pure sugar yield (Mg h<sup>-1</sup>) of sugar beet as affected by the interactions of potassium (K) and sulphure (S), in 2019/2020 season (Mean  $\pm$  SE) under soil salinity (ECe = 8.96 dS m<sup>-1</sup>) conditions.

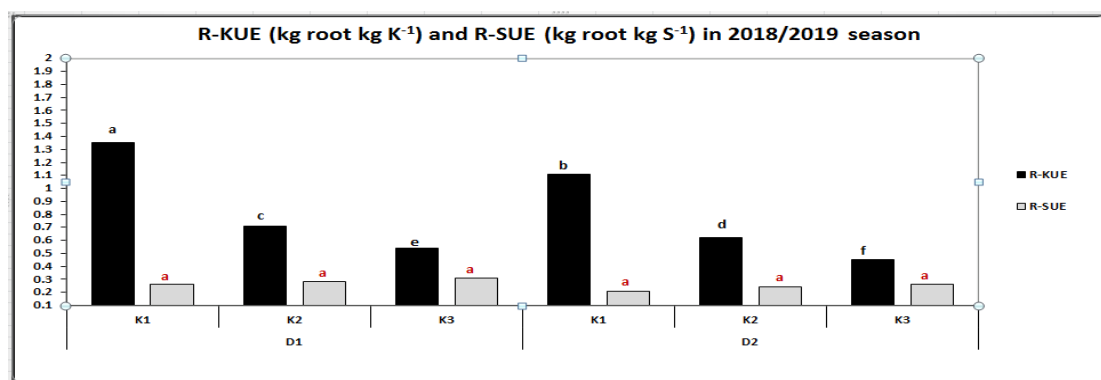

**Figure S14.** R-KUE (kg root kg K<sup>-1</sup>) and R-SUE (kg root kg S<sup>-1</sup>) of sugar beet as affected by the interactions of sowing dates (d) and potassium (K), in 2018/2019 season (Mean  $\pm$  SE) under soil salinity (ECe = 8.96 dS m<sup>-1</sup>) conditions.

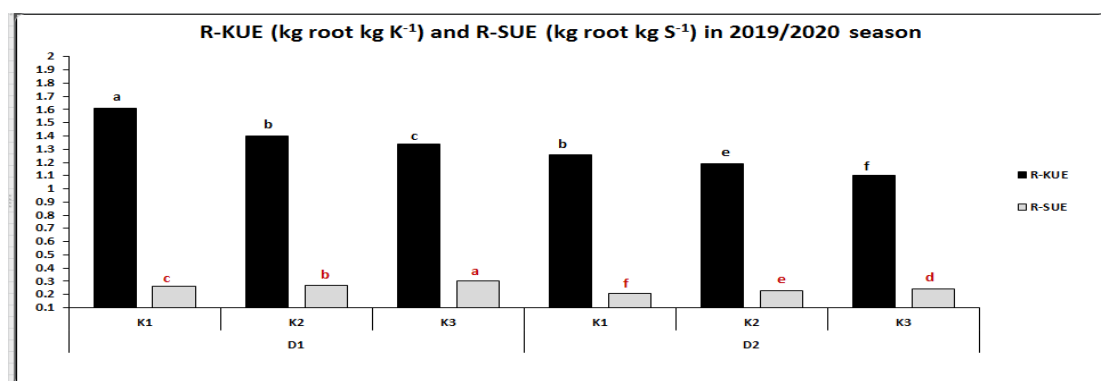

**Figure S15.** R-KUE (kg root kg K<sup>-1</sup>) and R-SUE (kg root kg S<sup>-1</sup>) of sugar beet as affected by the interactions of sowing dates (d) and potassium (K), in 2019/2020 season (Mean  $\pm$  SE) under soil salinity (ECe = 8.96 dS m<sup>-1</sup>) conditions.

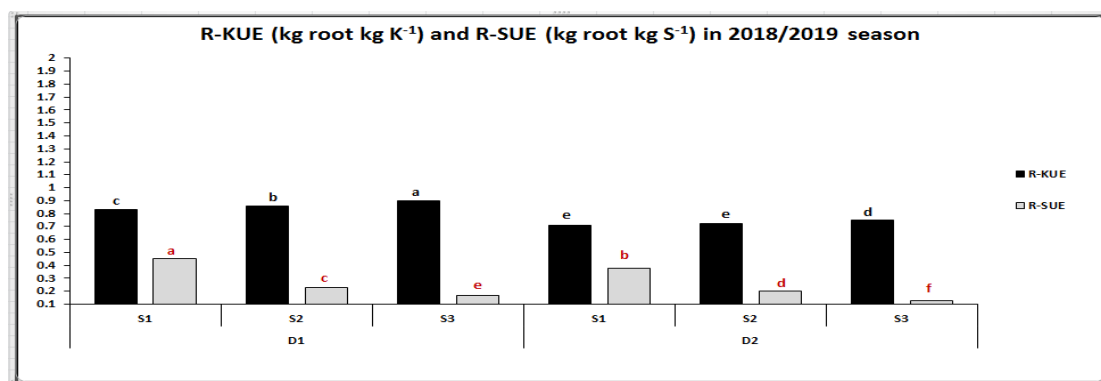

**Figure S16.** R-KUE (kg root kg K<sup>-1</sup>) and R-SUE (kg root kg S<sup>-1</sup>) of sugar beet as affected by the interactions of sowing dates (d) and sulphure (S), in 2018/2019 season (Mean  $\pm$  SE) under soil salinity (ECe = 8.96 dS m<sup>-1</sup>) conditions.

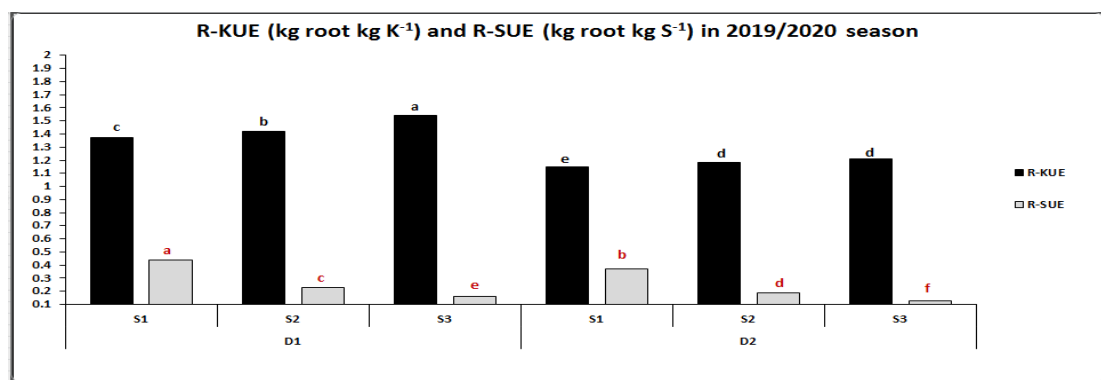

**Figure S17.** R-KUE (kg root kg K<sup>-1</sup>) and R-SUE (kg root kg S<sup>-1</sup>) of sugar beet as affected by the interactions of sowing dates (d) and sulphure (S), in 2019/2020 season (Mean  $\pm$  SE) under soil salinity (ECe = 8.96 dS m<sup>-1</sup>) conditions.

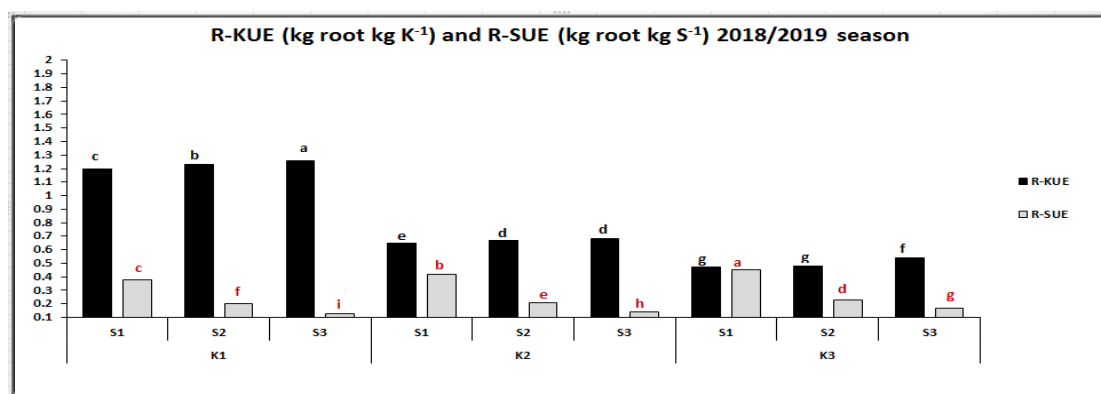

**Figure S18.** R-KUE (kg root kg K<sup>-1</sup>) and R-SUE (kg root kg S<sup>-1</sup>) of sugar beet as affected by the interactions of potassium (K) and sulphur (S), in 2018/2019 season (Mean  $\pm$  SE) under soil salinity (ECe = 8.96 dS m<sup>-1</sup>) conditions.

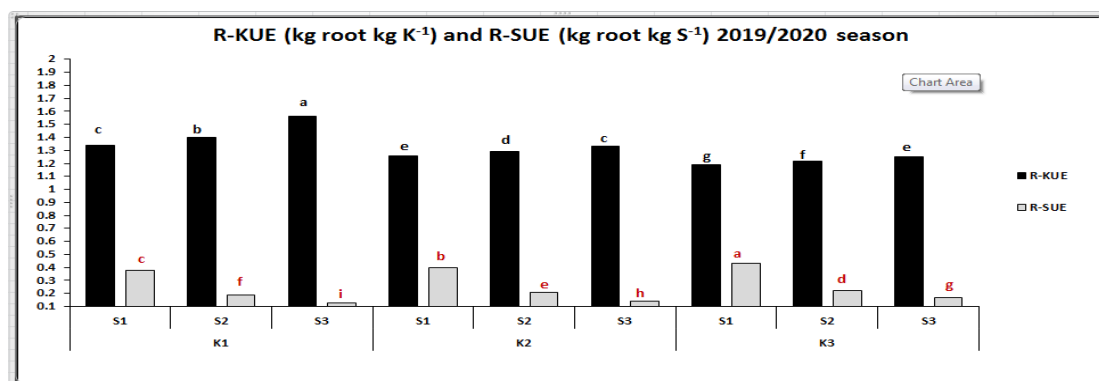

**Figure S19.** R-KUE (kg root kg K<sup>-1</sup>) and R-SUE (kg root kg S<sup>-1</sup>) of sugar beet as affected by the interactions of potassium (K) and sulphur (S), in 2019/2020 season (Mean ± SE) under soil salinity (ECe = 8.96 dS m<sup>-1</sup>) conditions.

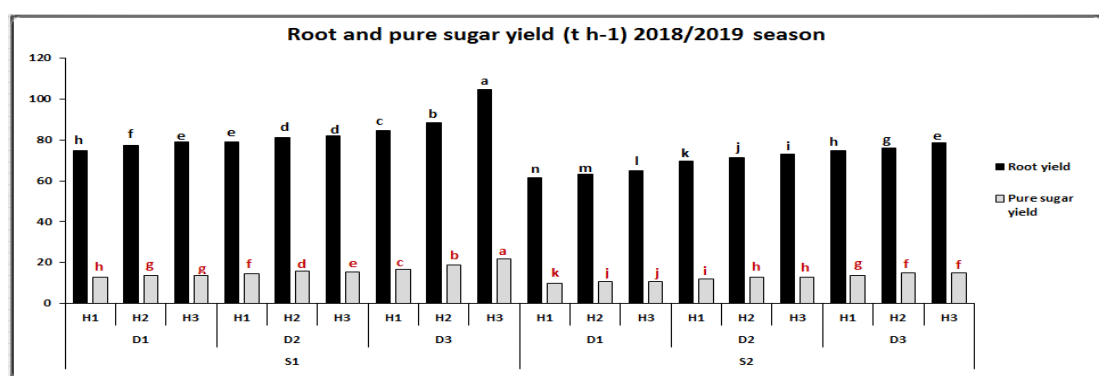

**Figure S20.** Root yield (Mg ha<sup>-1</sup>) and pure sugar yield (Mg ha<sup>-1</sup>) of sugar beet as affected by the interactions of sowing date (D), potassium (K) and sulphur (S), in 2018/2019 season (Mean ± SE) under soil salinity (ECe = 8.96 dS m<sup>-1</sup>) conditions.

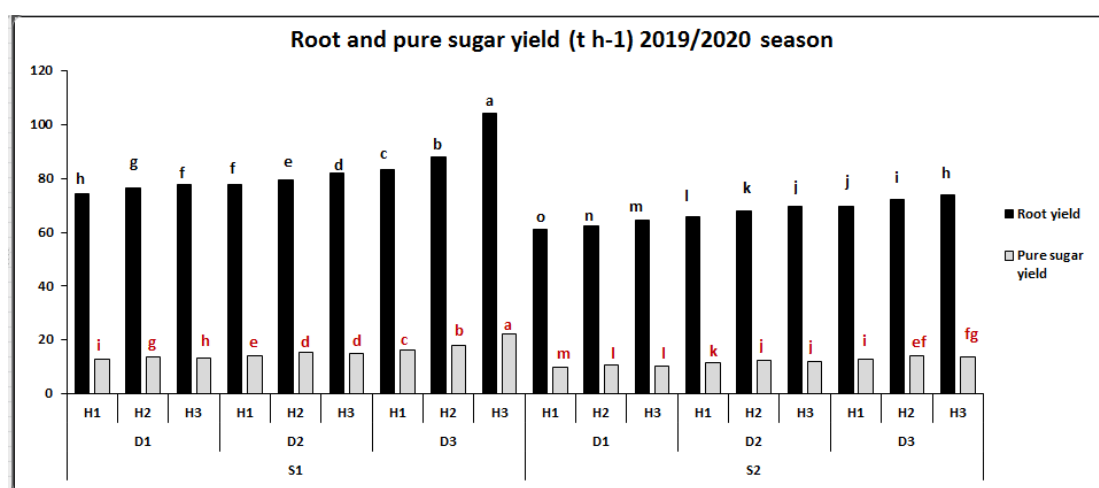

**Figure S21.** Root yield (Mg ha<sup>-1</sup>) and pure sugar yield (Mg ha<sup>-1</sup>) of sugar beet as affected by the interactions of sowing date (D), potassium (K) and sulphur (S), in 2019/2020 season (Mean ± SE) under soil salinity (ECe = 8.96 dS m<sup>-1</sup>) conditions.
